# Supplementary material
Source: PubMed Central journal article supplement (PMC5947939)
Supplement: EHP1673.s001.acco.pdf [file EHP1673.s001.acco.pdf]

**Note to readers with disabilities:** *EHP* strives to ensure that all journal content is accessible to all readers. However, some figures and Supplemental Material published in *EHP* articles may not conform to [508 standards](#) due to the complexity of the information being presented. If you need assistance accessing journal content, please contact [ehp508@niehs.nih.gov](mailto:ehp508@niehs.nih.gov). Our staff will work with you to assess and meet your accessibility needs within 3 working days.

### **Supplemental Material**

#### **Long-term Fine Particulate Matter Exposure and Nonaccidental and Cause-specific Mortality in a Large National Cohort of Chinese Men**

Peng Yin, Michael Brauer, Aaron Cohen, Richard T. Burnett, Jiangmei Liu, Yunning Liu, Ruiming Liang, Weihua Wang, Jinlei Qi, Lijun Wang, and Maigeng Zhou

#### **Table of Contents**

**Table S1:** Hazard ratio (95%CI) per  $10\mu\text{g}/\text{m}^3$  increase of  $\text{PM}_{2.5}$  for models with and without hypertension.

**Table S2:** Hazard ratios (95%CI) of mortality associated with  $10\mu\text{g}/\text{m}^3$  increase in  $\text{PM}_{2.5}$  levels by incremental adjustment for risk factors, -2LL and percent change in the -2LL relative to the age-adjusted basic model.

**Table S3:** Characteristics of cohort participants according to region and urban/rural.

**Figure S1:** HRs (95%CI) of non-accidental causes, CVD, IHD, stroke, lung cancer and COPD mortality associated with increased quintiles (Q) of  $\text{PM}_{2.5}$ , adjusted for age, individual-level covariates including marital status, educational level, smoking status, years of smoking, cigarettes per day, passive smoking, occupational exposure, alcohol drinking, units of alcohol per week, BMI, consumption of fresh fruit and vegetables, and indoor air pollution, and area-level covariates including urban/rural, region and mean years of education.  $\text{PM}_{2.5}$  cutpoints were based on average exposures during 2000–2005 for each cohort site at baseline. Q1: 18.6 (4.2-27.0), Q2: 29.5 (27.3-34.5), Q3: 41.1 (35.6-48.4), Q4: 57.0 (52.1-60.1), Q5: 69.5 (60.4-83.8).

**Figure S2.** Comparison of hazard ratios associated with  $10\mu\text{g}/\text{m}^3$  increase of  $\text{PM}_{2.5}$  between our study and major cohort studies.

**References.**

**Supplementary materials:**

**Table S1: Hazard ratio (95%CI) per 10ug/m<sup>3</sup> increase of PM<sub>2.5</sub><sup>a</sup> for models with and without hypertension**

| Cause of death | Main model <sup>b</sup> | Main model + hypertension |
|----------------|-------------------------|---------------------------|
| Non accidental | 1.09 (1.08-1.09)        | 1.08 (1.08, 1.09)         |
| Cardiovascular | 1.09 (1.08-1.10)        | 1.08 (1.07, 1.10)         |
| IHD            | 1.09 (1.06-1.12)        | 1.09 (1.06, 1.12)         |
| Stroke         | 1.14 (1.13-1.16)        | 1.14 (1.12, 1.15)         |
| COPD           | 1.12 (1.10-1.13)        | 1.12 (1.10-1.13)          |
| Lung cancer    | 1.12 (1.07-1.14)        | 1.12 (1.07-1.14)          |

<sup>a</sup>PM<sub>2.5</sub> levels were based on mean exposures during 2000–2005 at each participant’s baseline cohort site.

<sup>b</sup>Adjusted for age, individual-level covariates including marital status, educational level, smoking status, years of smoking, cigarettes per day, passive smoking, occupational exposure, alcohol drinking, units of alcohol per week, BMI, consumption of fresh fruit and vegetables, and indoor air pollution, and area-level covariates including urban/rural, region and mean years of education. This model corresponds to “model 2” in Table 3 in the manuscript.

**Table S2: Hazard ratios (95%CI) of mortality associated with 10ug/m<sup>3</sup> increase in PM<sub>2.5</sub> levels<sup>a</sup> by incremental adjustment for risk factors, -2LL and percent change in the -2LL relative to the age-adjusted basic model**

| Cause of death        | Age-adjusted basic model | Model 1         | Model 2         | Model 3         | Model 4         | Model 5         | Model 6         | Model 7         | Model 8         |
|-----------------------|--------------------------|-----------------|-----------------|-----------------|-----------------|-----------------|-----------------|-----------------|-----------------|
| <b>Non-accidental</b> |                          |                 |                 |                 |                 |                 |                 |                 |                 |
| HR (95%CI)            | 1.03(1.02-1.03)          | 1.04(1.03-1.04) | 1.03(1.02-1.03) | 1.05(1.05-1.06) | 1.03(1.03-1.04) | 1.07(1.07-1.08) | 1.03(1.03-1.04) | 1.05(1.05-1.06) | 1.09(1.08-1.09) |
| -2LL(% change)        | 813238(0)                | 761946(-6.3)    | 712884(-12.3)   | 601543(-26.0)   | 761916(-6.3)    | 554665(-31.8)   | 712864(-12.3)   | 601542(-26.0)   | 554590(-31.8)   |
| <b>Cardiovascular</b> |                          |                 |                 |                 |                 |                 |                 |                 |                 |
| HR (95%CI)            | 1.07(1.06-1.07)          | 1.06(1.05-1.07) | 1.06(1.05-1.07) | 1.08(1.07-1.09) | 1.04(1.03-1.05) | 1.09(1.08-1.10) | 1.04(1.03-1.05) | 1.07(1.06-1.09) | 1.09(1.08-1.10) |
| -2LL(% change)        | 287716(0)                | 285040(-0.9)    | 266691(-7.3)    | 224310(-22.0)   | 284962(-1.0)    | 206935(-28.1)   | 266587(-7.3)    | 224310(-22.0)   | 206934(-28.1)   |
| <b>IHD</b>            |                          |                 |                 |                 |                 |                 |                 |                 |                 |
| HR (95%CI)            | 1.14(1.12-1.15)          | 1.11(1.09-1.13) | 1.09(1.07-1.11) | 1.14(1.11-1.16) | 1.05(1.03-1.07) | 1.11(1.08-1.13) | 1.05(1.03-1.07) | 1.09(1.07-1.12) | 1.09(1.06-1.12) |
| -2LL(% change)        | 56530(0)                 | 55849(-1.2)     | 51416(-9.0)     | 43491(-23.1)    | 55662(-1.5)     | 39457(-30.2)    | 51266(-9.3)     | 43451(-23.1)    | 39451(-30.2)    |
| <b>Stroke</b>         |                          |                 |                 |                 |                 |                 |                 |                 |                 |
| HR (95%CI)            | 1.08(1.07-1.09)          | 1.07(1.06-1.08) | 1.07(1.06-1.08) | 1.09(1.08-1.11) | 1.06(1.05-1.07) | 1.13(1.11-1.14) | 1.06(1.04-1.07) | 1.11(1.10-1.13) | 1.14(1.13-1.16) |
| -2LL(% change)        | 173814(0)                | 171875(-1.1)    | 161299(-7.2)    | 134790(-22.5)   | 171853(-1.1)    | 124435(-28.4)   | 161252(-7.2)    | 134761(-22.5)   | 124408(-28.4)   |
| <b>COPD</b>           |                          |                 |                 |                 |                 |                 |                 |                 |                 |
| HR (95%CI)            | 0.98(0.97-0.98)          | 1.00(0.99-1.01) | 1.00(0.99-1.01) | 1.01(1.00-1.02) | 1.05(1.04-1.06) | 1.05(1.04-1.07) | 1.07(1.06-1.08) | 1.06(1.05-1.08) | 1.12(1.10-1.13) |
| -2LL(% change)        | 180580(0)                | 177215(-1.9)    | 167847(-7.1)    | 139296(-22.9)   | 176712(-2.1)    | 130292(-27.8)   | 166999(-7.5)    | 139005(-23.0)   | 129895(-28.1)   |
| <b>Lung cancer</b>    |                          |                 |                 |                 |                 |                 |                 |                 |                 |
| HR (95%CI)            | 1.03(1.01-1.05)          | 1.04(1.02-1.07) | 1.01(0.99-1.03) | 1.12(1.10-1.15) | 0.98(0.96-1.00) | 1.13(1.10-1.16) | 0.98(0.96-1.00) | 1.11(1.10-1.14) | 1.10(1.07-1.14) |
| -2LL(% change)        | 40049(0)                 | 39625(-1.1)     | 36395(-9.1)     | 30944(-22.7)    | 39419(-1.6)     | 27968(-30.2)    | 36336(-9.3)     | 30868(-22.9)    | 27957(-30.2)    |

<sup>a</sup>PM<sub>2.5</sub> levels were based on mean exposures during 2000–2005 at each participant’s baseline cohort site.

Model 1: age-adjusted basic model + individual-level covariates including marital status, educational level, smoking status, years of smoking, cigarettes per day, passive smoking, occupational exposure, alcohol drinking, units of alcohol per week, BMI, consumption of fresh fruit and vegetables, and indoor air pollution.

Model 1 corresponds to “model 1” in Table 3 in the manuscript.

Model 2: model 1 + urban/rural

Model 3: model 1 + region

Model 4: model 1 + area-level mean years of education

Model 5: model 1 + urban/rural + region

Model 6: model 1 + urban/rural + area-level mean years of education

Model 7: model 1 + region + area-level mean years of education

Model 8: model 1 + region + urban/rural + area-level mean years of education. Model 8 corresponds to “model 2” in Table 3 in the manuscript.

**Table S3: Characteristics of cohort participants according to region and urban/rural**

|               | No. of participants | Mean PM <sub>2.5</sub> (range) | Non-accidental |                 | CVD           |                 | COPD          |                 | Lung cancer   |                 |
|---------------|---------------------|--------------------------------|----------------|-----------------|---------------|-----------------|---------------|-----------------|---------------|-----------------|
|               |                     |                                | No. of deaths  | Mortality rate* | No. of deaths | Mortality rate* | No. of deaths | Mortality rate* | No. of deaths | Mortality rate* |
| Northeast     | 19413               | 22.7(16.5-33.2)                | 5065           | 2543            | 2103          | 1074            | 640           | 351             | 430           | 202             |
| Urban         | 4424                | 27.1(18.7-33.2)                | 1297           | 2539            | 589           | 1159            | 155           | 310             | 102           | 197             |
| Rural         | 14989               | 20.8(16.5-25.1)                | 3768           | 2567            | 1514          | 1048            | 485           | 372             | 328           | 205             |
| North         | 16577               | 45.5(20.7-56.5)                | 4579           | 2837            | 2104          | 1295            | 783           | 530             | 270           | 155             |
| Urban         | 6523                | 39.8(30.1-52.1)                | 1468           | 2052            | 669           | 948             | 139           | 202             | 171           | 220             |
| Rural         | 10054               | 48.0(20.7-56.5)                | 3111           | 3517            | 1435          | 1592            | 644           | 828             | 99            | 101             |
| Northwest     | 21363               | 44.8(25.9-55.0)                | 6466           | 3181            | 2630          | 1318            | 1652          | 858             | 223           | 100             |
| Urban         | 4930                | 33.0(25.9-43.9)                | 1513           | 3216            | 415           | 894             | 507           | 1100            | 56            | 111             |
| Rural         | 16433               | 48.7(39.1-55.0)                | 4953           | 3168            | 2215          | 1436            | 1145          | 785             | 167           | 97              |
| Southwest     | 39267               | 39.5(15.5-71.1)                | 11811          | 2770            | 3488          | 818             | 4190          | 996             | 466           | 102             |
| Urban         | 4527                | 38.8(24.3-63.8)                | 2078           | 4121            | 624           | 1241            | 378           | 728             | 157           | 324             |
| Rural         | 34740               | 39.6(15.5-71.1)                | 9733           | 2584            | 2864          | 763             | 3812          | 1031            | 309           | 75              |
| South-central | 78103               | 46.2(28.3-69.6)                | 18340          | 2240            | 7315          | 898             | 3680          | 474             | 834           | 94              |
| Urban         | 10805               | 43.1(34.5-60.1)                | 2083           | 2063            | 863           | 867             | 272           | 302             | 157           | 132             |
| Rural         | 67298               | 46.4(28.3-69.6)                | 16257          | 2275            | 6452          | 907             | 3408          | 500             | 677           | 89              |
| East          | 15070               | 43.8(27.3-75.1)                | 3761           | 2186            | 1219          | 712             | 1044          | 629             | 300           | 164             |
| Urban         | 7054                | 62.6(46.1-75.1)                | 1490           | 1636            | 578           | 637             | 186           | 208             | 151           | 155             |
| Rural         | 8016                | 27.3(27.3-27.3)                | 2271           | 2795            | 641           | 788             | 858           | 1132            | 149           | 163             |

\*age-adjusted mortality rate (per 100,000 person years)

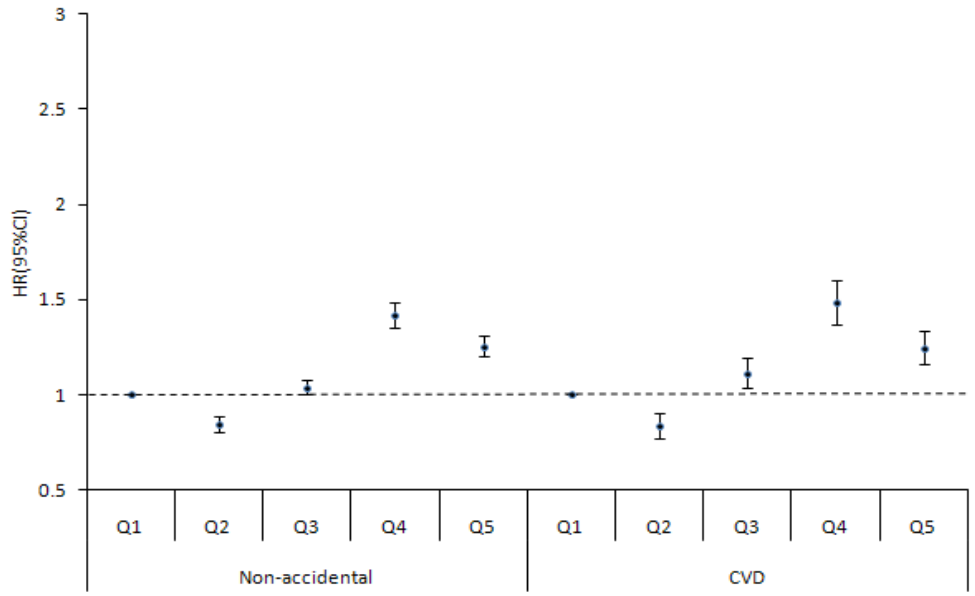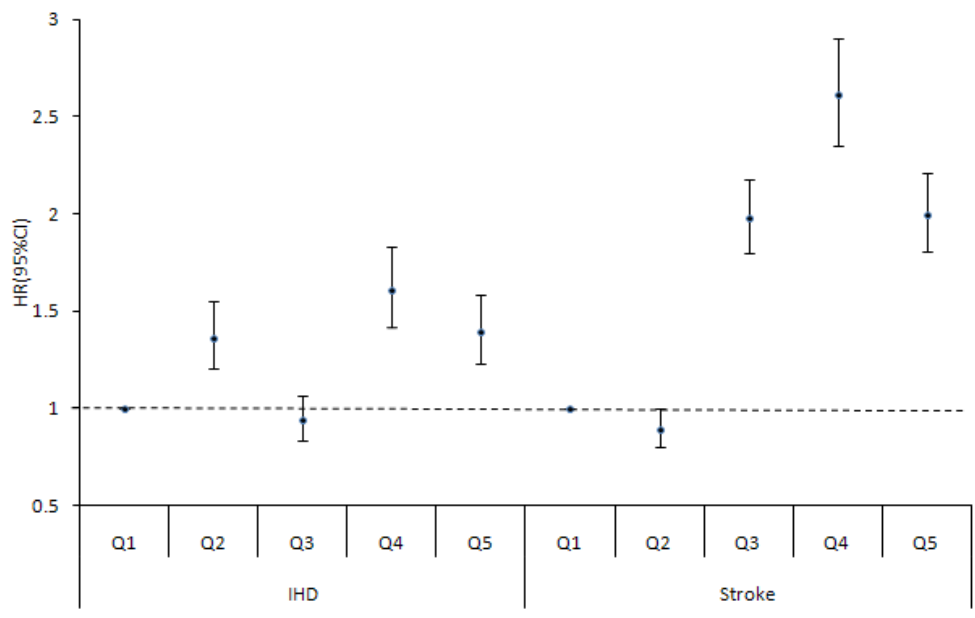

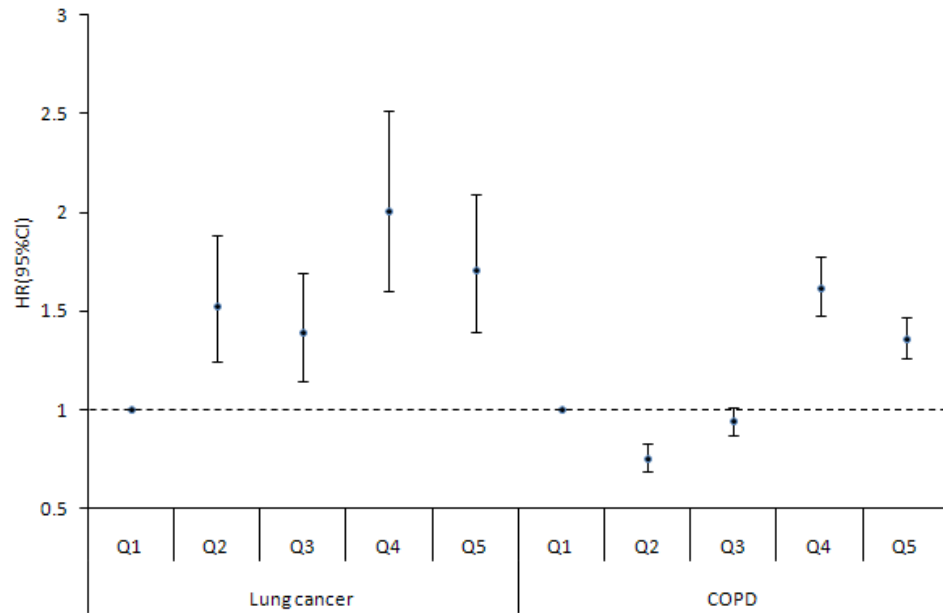

**Figure S1: HRs(95%CI) of non-accidental causes, CVD, IHD, stroke, lung cancer and COPD mortality associated with increased quintiles (Q) of  $PM_{2.5}$ , adjusted for age, individual-level covariates including marital status, educational level, smoking status, years of smoking, cigarettes per day, passive smoking, occupational exposure, alcohol drinking, units of alcohol per week, BMI, consumption of fresh fruit and vegetables, and indoor air pollution, and area-level covariates including urban/rural, region and mean years of education.  $PM_{2.5}$  cutpoints were based on average exposures during 2000–2005 for each cohort site at baseline. Q1: 18.6 (4.2-27.0), Q2: 29.5 (27.3-34.5), Q3: 41.1 (35.6-48.4), Q4: 57.0 (52.1-60.1), Q5: 69.5 (60.4-83.8).**

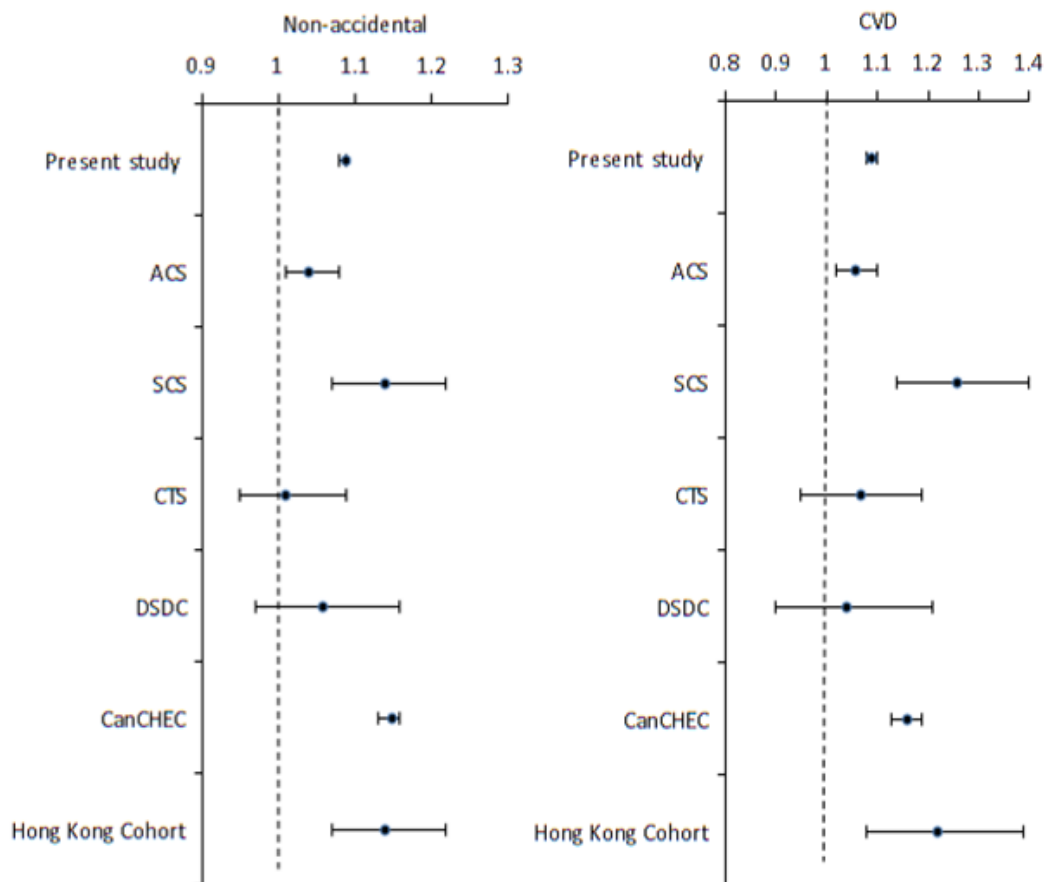



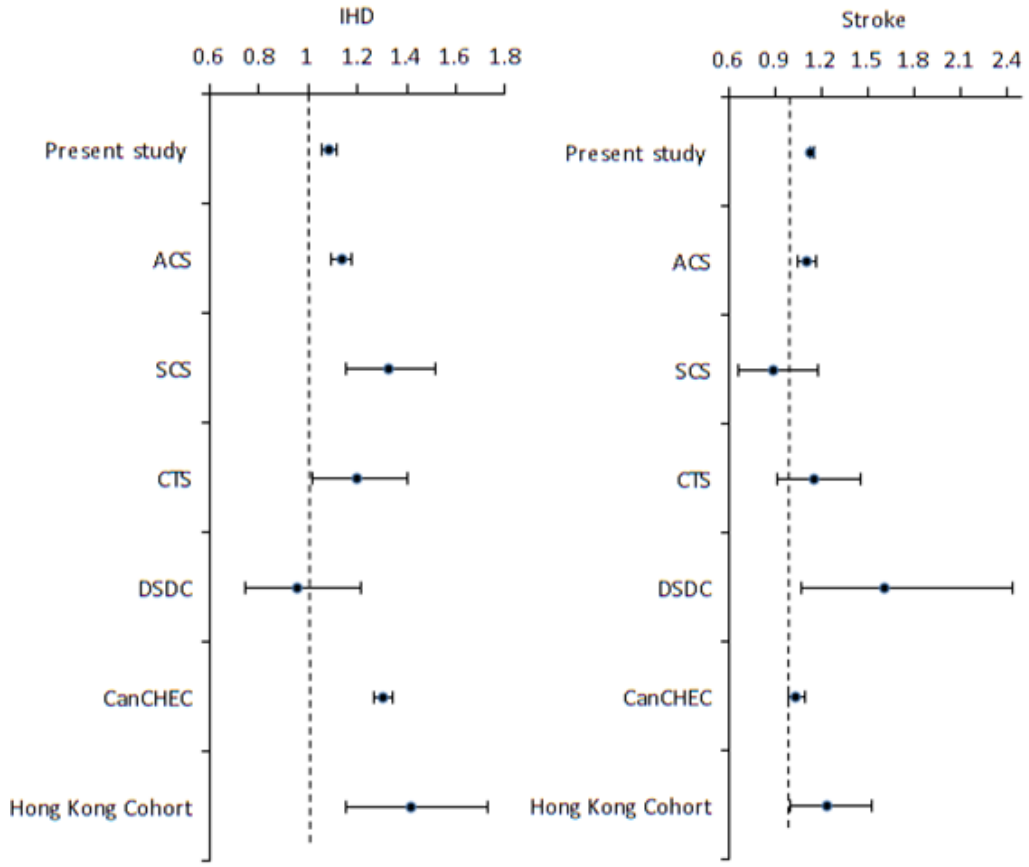

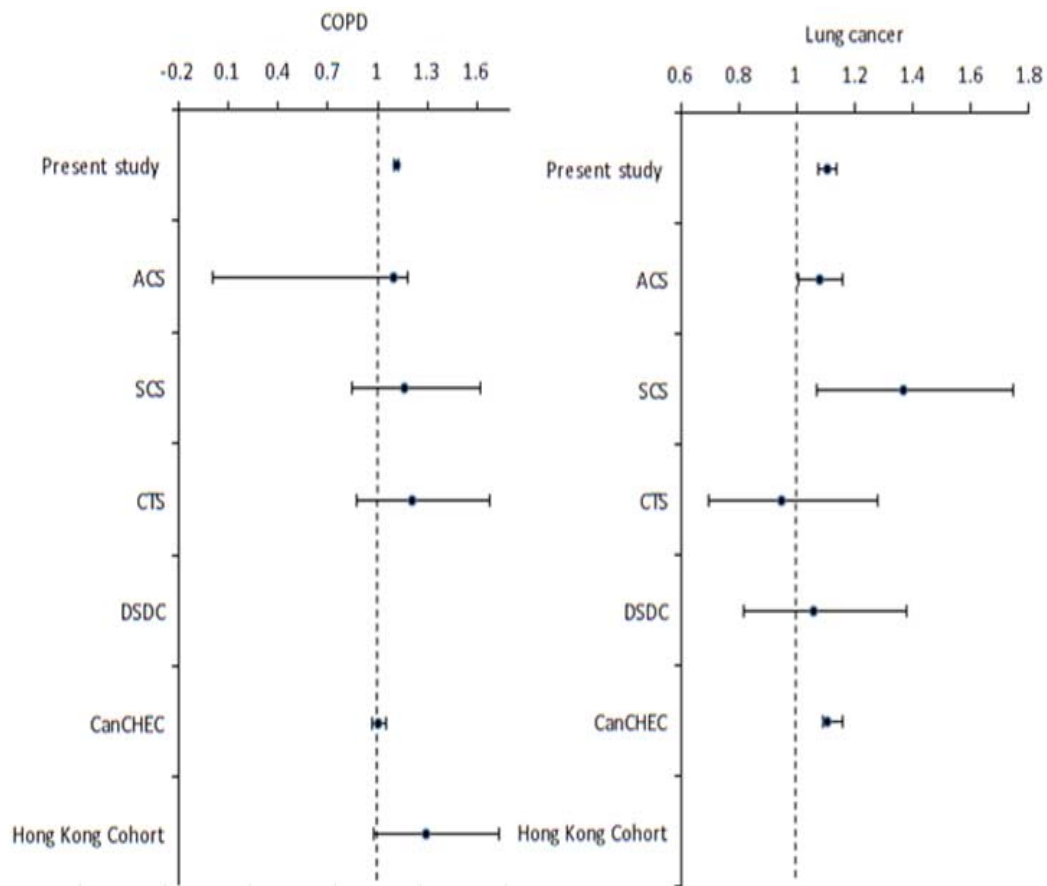

Figure S2. Comparison of hazard ratios associated with  $10\mu\text{g}/\text{m}^3$  increase of  $\text{PM}_{2.5}$  between our study and major cohort studies.

ACS: American Cancer Society Cancer Prevention Study II (Krewski et al, 2009);

SCS: Six City Study (Lepeule et al, 2012);

CTS: California Teachers Study (Lispett et al, 2011);

DSDC: Dutch Study of Diet and Cancer (Beelen et al, 2008);

CanCHEC: Canadian Census Health and Environment Cohort (Crouse et al, 2012);

Hong Kong cohort (Wong et al, 2015).

References:

Beelen R, Hoek G, van den Brandt PA, Goldbohm RA, Fischer P, Schouten LJ, et al. 2008. Long-term effects of traffic-related air pollution on mortality in a dutch cohort (nlcs-air study). *Environ Health Perspect* 116:196-202.

Crouse DL, Peters PA, van Donkelaar A, Goldberg MS, Villeneuve PJ, Brion O, et al. 2012. Risk of nonaccidental and cardiovascular mortality in relation to long-term exposure to low concentrations of fine particulate matter: A canadian national-level cohort study. *Environ Health Perspect* 120:708-714.

Krewski D, Jerrett M, Burnett RT, Ma R, Hughes E, Shi Y, et al. 2009. Extended follow-up and spatial analysis of the american cancer society study linking particulate air pollution and mortality. *Research report*:5-114; *discussion* 115-136.

Lepeule J, Laden F, Dockery D, Schwartz J. 2012. Chronic exposure to fine particles and mortality: An extended follow-up of the harvard six cities study from 1974 to 2009. *Environ Health Perspect* 120:965-970.

Lipsett MJ, Ostro BD, Reynolds P, Goldberg D, Hertz A, Jerrett M, et al. 2011. Long-term exposure to air pollution and cardiorespiratory disease in the california teachers study cohort. *Am J Respir Crit Care Med* 184:828-835.

Wong CM, Lai HK, Tsang H, Thach TQ, Thomas GN, Lam KB, et al. 2015. Satellite-based estimates of long-term exposure to fine particles and association with mortality in elderly hong kong residents. *Environ Health Perspect* 123:1167-1172.
